# Supplementary material for: Charge transfer complexes and radical cation salts of chiral methylated organosulfur donors
Source: Royal Society of Chemistry journal article supplement (doi:10.1039/c3ce42539h), 2014-01-01
Supplement: c3ce42539h1.pdf [file c3ce42539h1.pdf]

**Charge transfer complexes and radical cation salts of chiral methylated  
organosulfur donors**

Songjie Yang, Flavia Pop, Caroline Melan, Andrew C. Brooks, Lee Martin, Peter Horton,  
Pascale Auban-Senzier, Geert L. J. A. Rikken, Narcis Avarvari and John D. Wallis

SUPPORTING INFORMATION

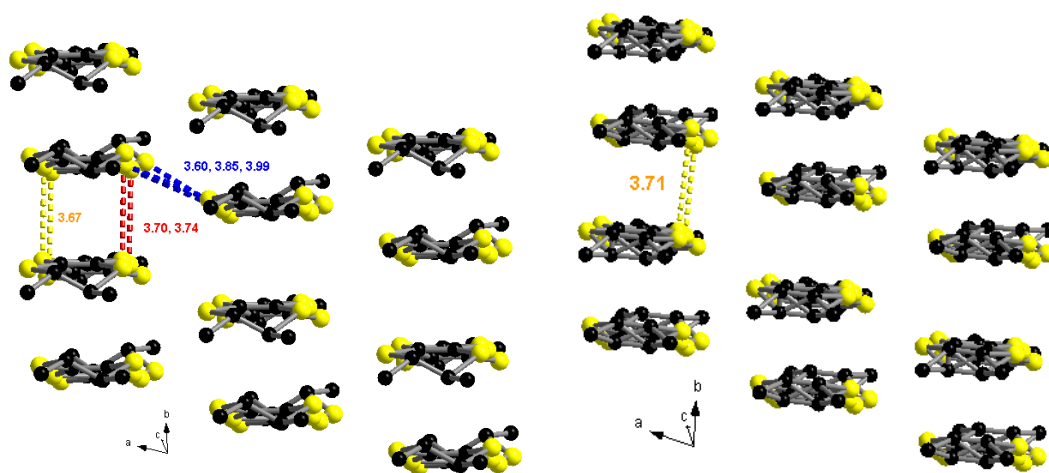

**Fig. S1** Packing diagram of  $[(S)-5]_2AsF_6$  (left) and  $[(rac)-5]_2AsF_6$  (right) with an emphasis on the S...S short contacts.  $AsF_6$  anions and protons have been omitted.

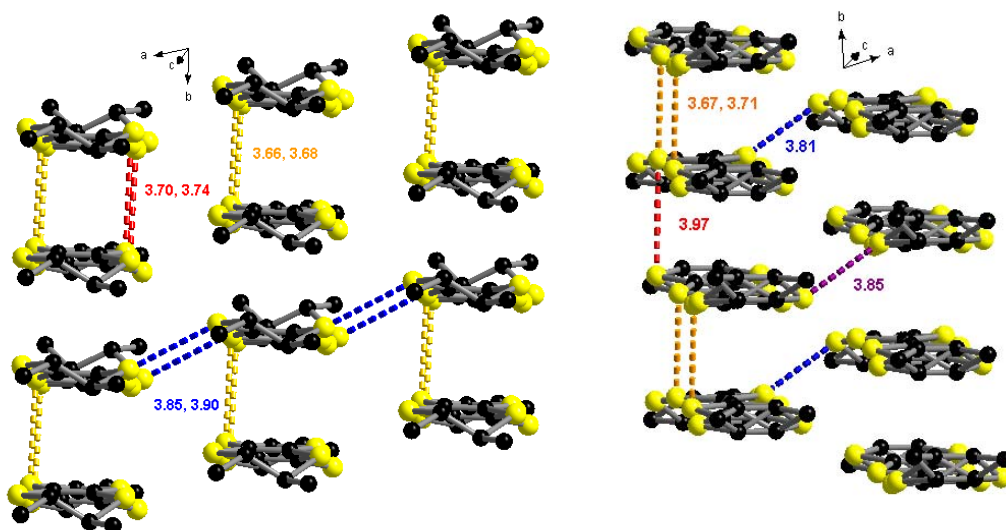

**Fig. S2** Packing diagram of  $[(S)-5]_2SbF_6$  (left) and  $[(rac)-5]_2SbF_6$  (right) with an emphasis on the S...S short contacts.  $SbF_6$  anions and protons have been omitted.

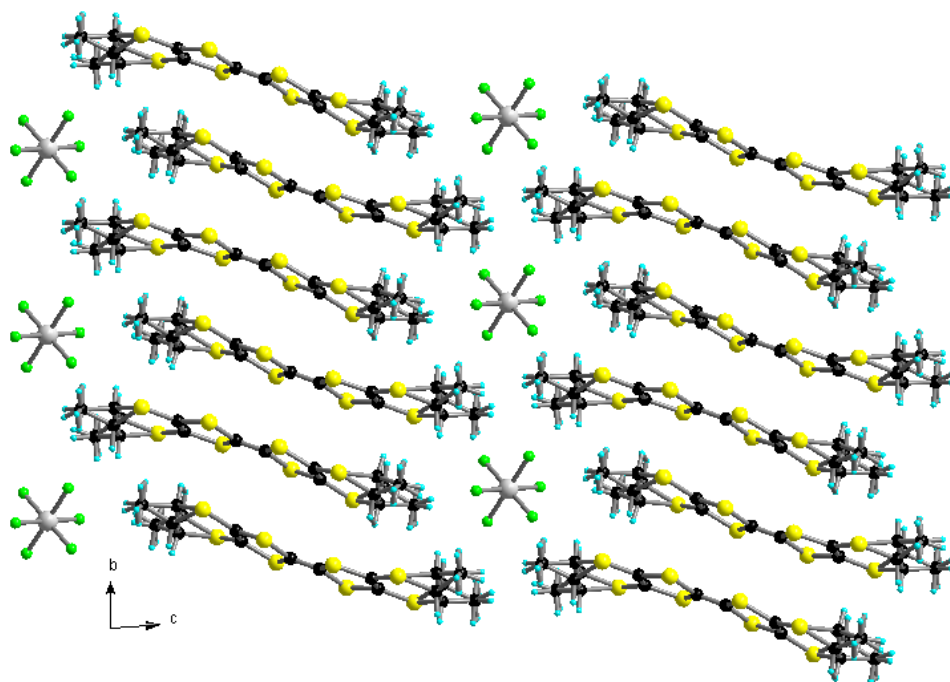

**Fig. S3** Packing diagram of  $[(rac)\text{-}5]_2\text{SbF}_6$  in the  $bc$  plane.

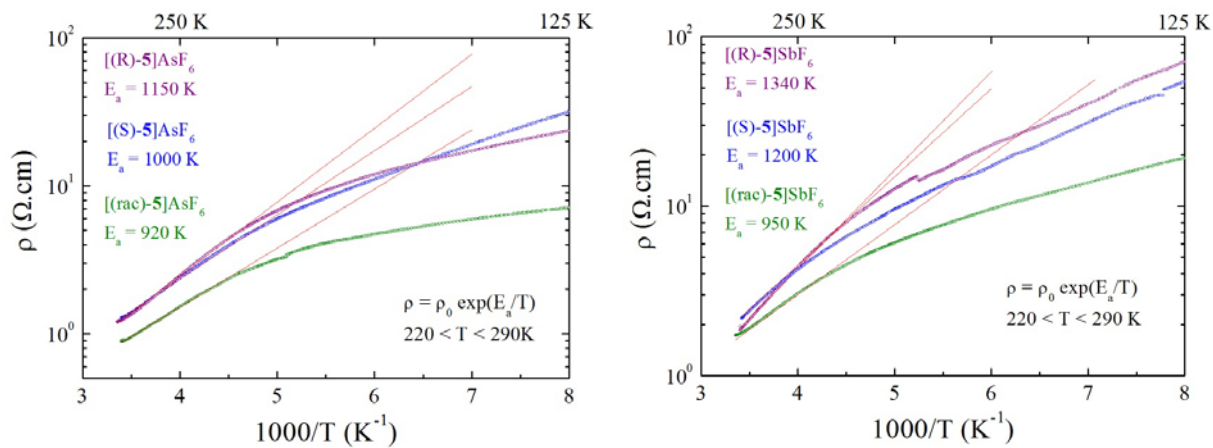

**Fig. S4** Temperature dependence of the electrical resistivity, plotted as  $\rho$  versus the inverse temperature, for single crystals of  $[\mathbf{5}]_2\text{AsF}_6$  (left) and  $[\mathbf{5}]_2\text{SbF}_6$  (right).
